# Supplementary material for: Efficacy and Safety of Resveratrol Supplements on Blood Lipid and Blood Glucose Control in Patients with Type 2 Diabetes: A Systematic Review and Meta-Analysis of Randomized Controlled Trials
Source: Evid Based Complement Alternat Med. 2021 Aug 24;2021:5644171. doi: 10.1155/2021/5644171 (PMC8410426; doi:10.1155/2021/5644171)
Supplement: Supplementary Materials — The “PRISMA 2020 checklist” is a standardized checklist that ensures that systematic reviews and meta-analyses are implemented according to this standard. Table S1: search strategies for PubMed. [file 5644171.f1.zip]

Archive with 2 entries (2 files):
- 5644171.f1/PRISMA_2020_checklist.pdf
- 5644171.f1/Table S1. Search Strategies for Pubmed.pdf
